# Supplementary material
Source: PubMed Central journal article supplement (PMC3408184)
Supplement: supp_M112.371757_Supplementary_Figures.pdf [file supp_M112.371757_Supplementary_Figures.pdf]

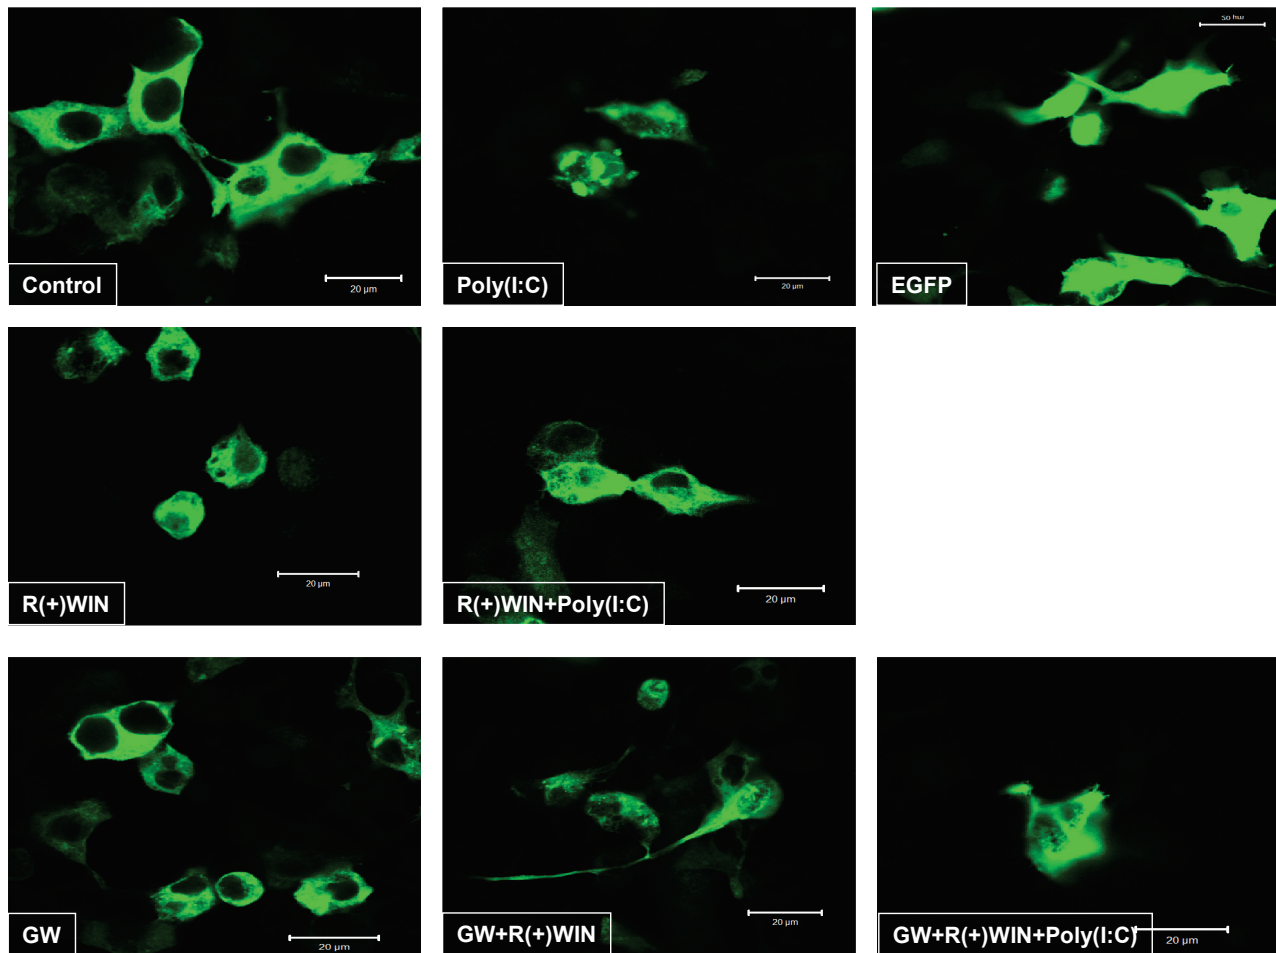

**Supplemental Figure 1** *R(+)*WIN55,212-2 promotes IRF3 translocation to the nucleus independently of PPAR $\alpha$ . HEK293-TLR3 cells were seeded ( $1.5 \times 10^5$  cells/ml) in 4 well chamber slides for 24 h and transfected using Lipofectamine 2000 with an expression construct encoding GFP-tagged IRF3 (800 ng). Control slides were transfected with EGFP construct (800 ng). The following day cells were pre-treated with or without GW6471 (1  $\mu$ M; 1 h) prior to treatment with *R(+)*WIN55,212-2 (20  $\mu$ M) for 1 h. Cells were then treated with/without poly(I:C) (25  $\mu$ g/ml) for 1 h. Cells were fixed in 4% PFA, washed, and mounted (Vectashield; Vector Laboratories). All samples were viewed using an Olympus FluoView FV1000 confocal laser scanning microscope equipped with the appropriate filter sets. Acquired images were analysed using the Olympus FV-10 ASW imaging software. Images are represented of data from three independent experiments. Control EGFP is demonstrated in HEK293-TLR3 cells. Scale bars are 20  $\mu$ m.

**A**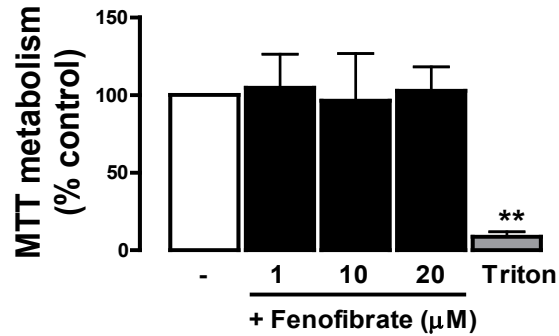**B**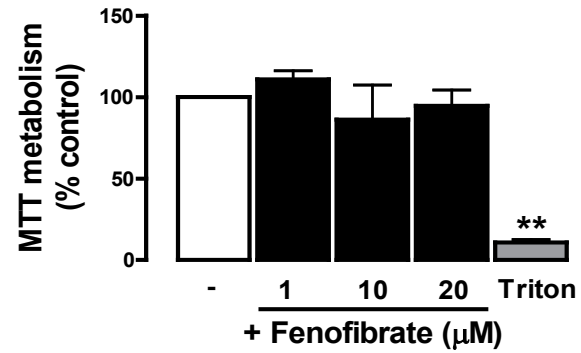

**Supplemental Figure 2** Fenofibrate does not impact cell viability. **(A)** HEK293 cells and **(B)** primary astrocytes ( $1.5 \times 10^5$  cells/ml) were seeded in 96-well plates and allowed to adhere for 24 h. Cells were treated with fenofibrate (1-20  $\mu\text{M}$ ; 6 h), vehicle or Triton X-100 (Sigma) (0.2% for 10 min) and assessed for cell viability using the MTT assay. \*\* $p < 0.01$  compared with vehicle-treated cells. All values are mean  $\pm$  SEM and are representative of data from 6 animals.

**A**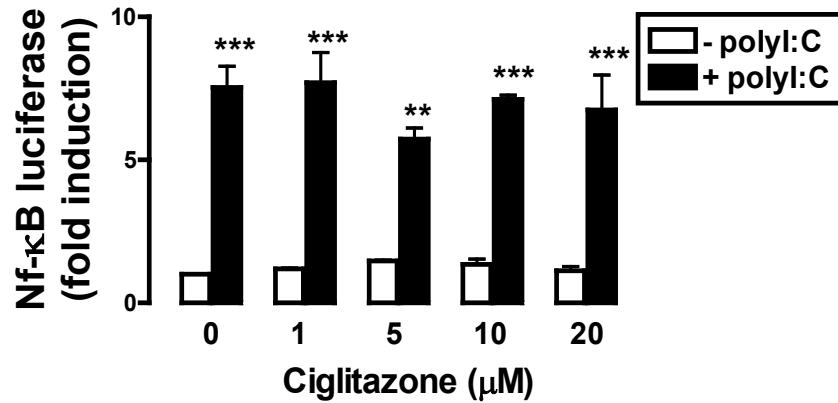**B**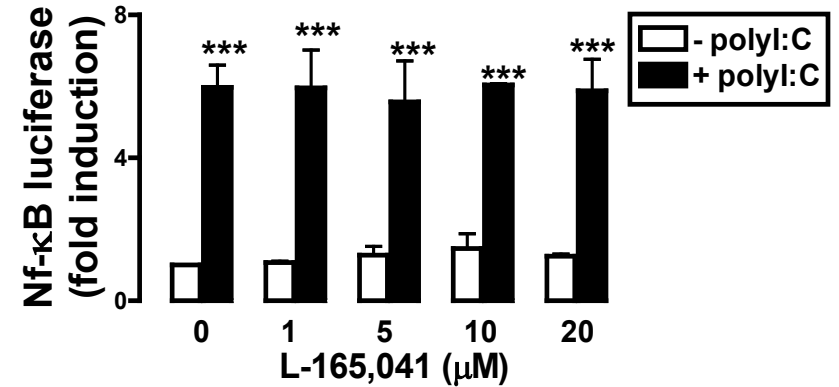

**Supplemental Figure 3** The effects of ciglitazone and L-165,041 on polyI:C-induction of NF-κB. HEK293-TLR3 were co-transfected with plasmids encoding NF-κB-regulated firefly luciferase and TK Renilla luciferase. 24 h post-transfection cells were treated in the absence or presence of (A) ciglitazone (1-20 μM) and (B) L-165,041 (1-20 μM) prior to *R*(+)WIN55,212-2 (20 μM) for 1 h. Cells were then treated with or without polyI:C (25 μg/ml) for 6 h. Lysates were assayed for luciferase activity and normalised for transfection efficiency using *Renilla* luciferase activity. \*\**p* < 0.01, \*\*\**p* < 0.001 compared with vehicle-treated cells. Data are mean ± S.E.M. of triplicate determinations and are representative of two independent experiments.
